# Supplementary material for: Transcription factor VRT2 reinitiates vernalization when interrupted by warm temperatures in a temperate grass model
Source: PubMed Central journal article supplement — Plant Physiol. 2024 Sep 24;196(4):2614–24. doi: 10.1093/plphys/kiae498 (PMC11638104; doi:10.1093/plphys/kiae498), 2024-09-24
Supplement: kiae498_supplementary_data.pdf [file kiae498_supplementary_data.pdf]

Fig. S1

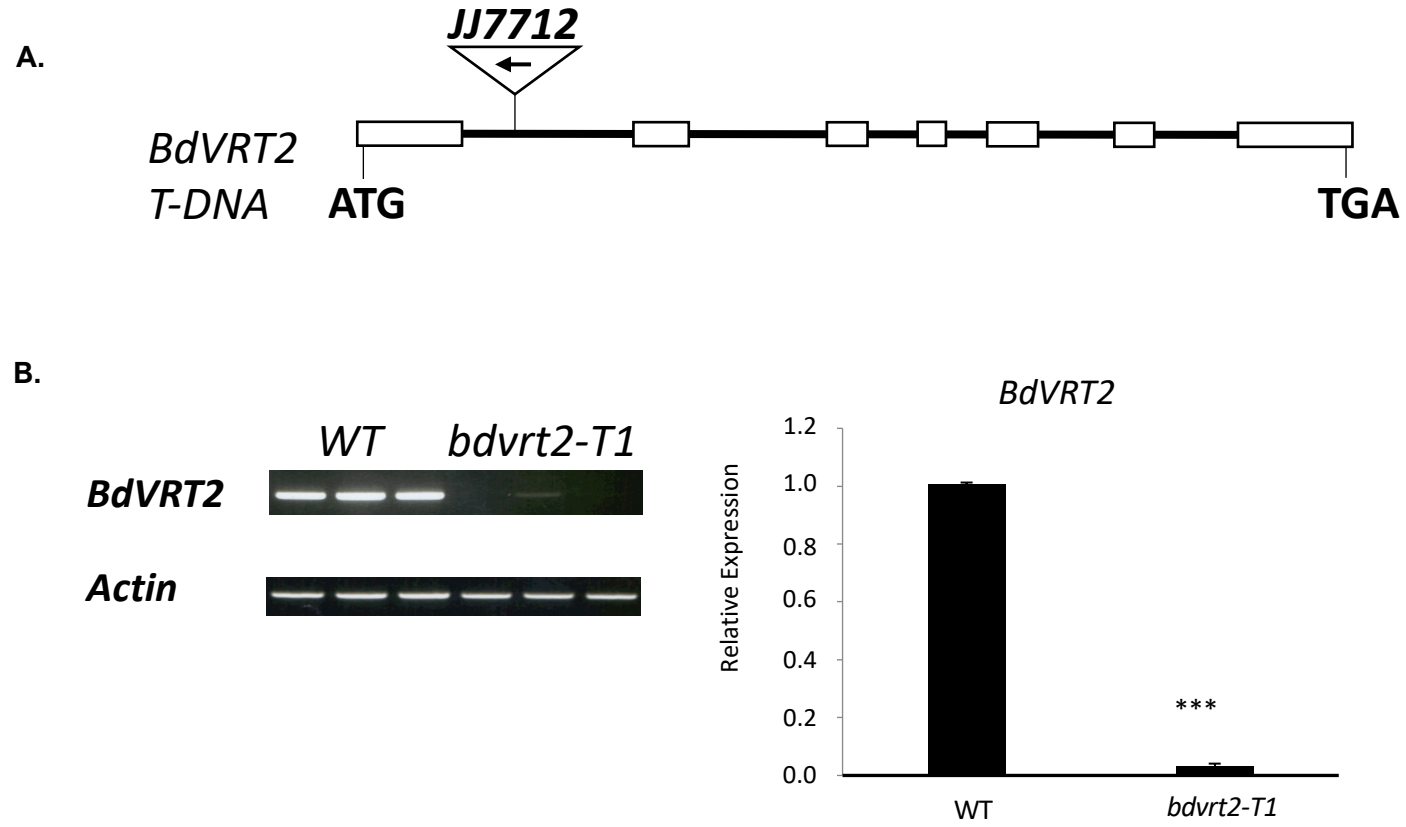

Supplementary Figure S1. T-DNA insertion model and expression of *BdVRT2* after 3 weeks of growth.

Fig. S2

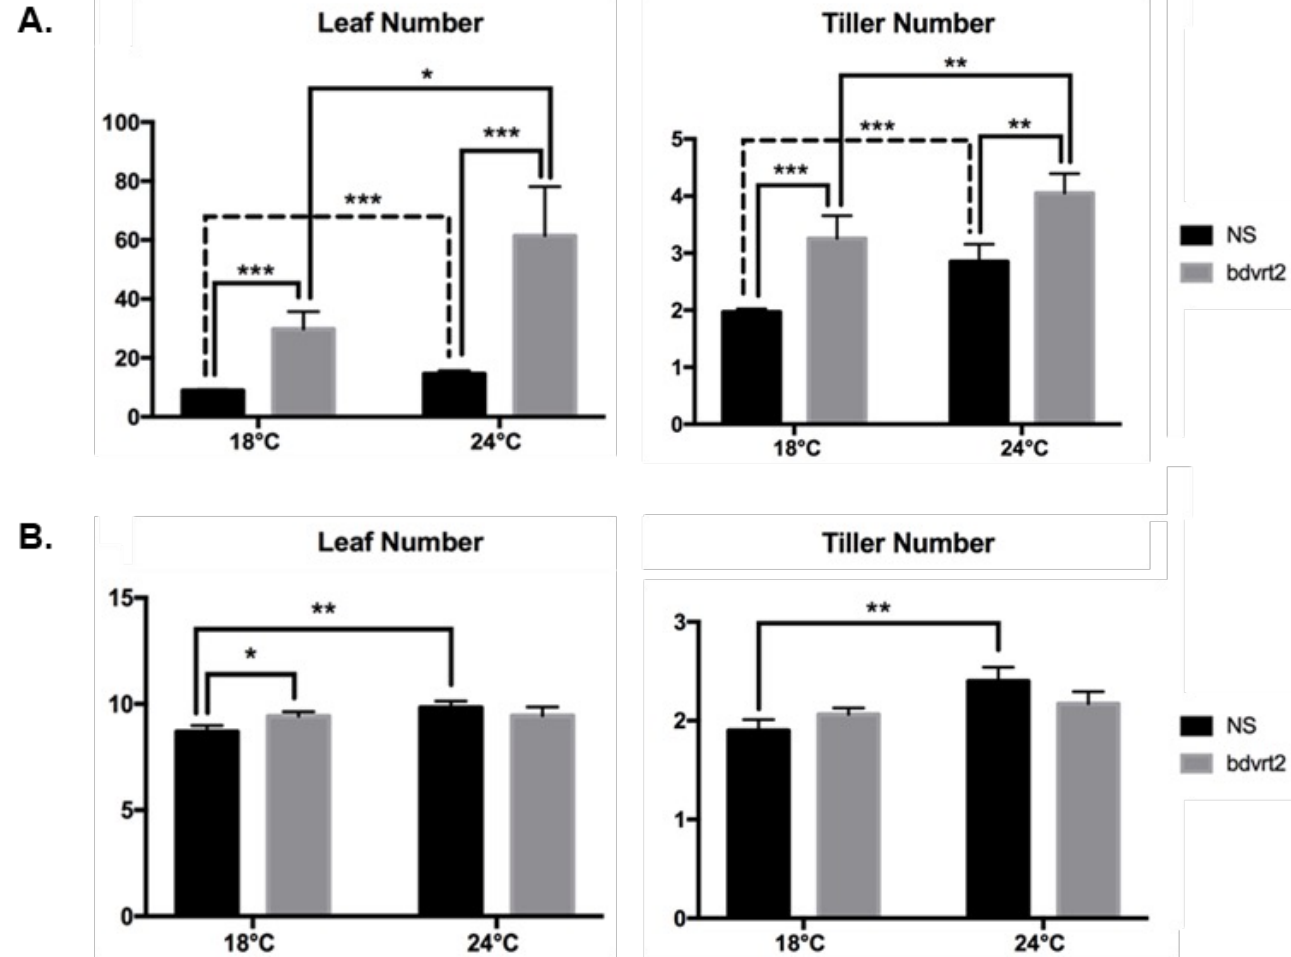

**Supplementary Figure S2. Leaf and tiller numbers of *bdvrt2* mutants and NS lines grown at 18°C or 24°C after incomplete or complete vernalisation. A. incomplete 2-week vernalisation or B. complete 4-week vernalisation. Leaf number is total leaf number at flowering time. Asterisks indicate the adjusted p-value from a Bonferroni-corrected Kruskal Wallis test: \* =  $p < 0.05$ ; \*\* =  $p < 0.01$ ; \*\*\* =  $p < 0.001$ . Error bars represent SEM.**

Fig. S3

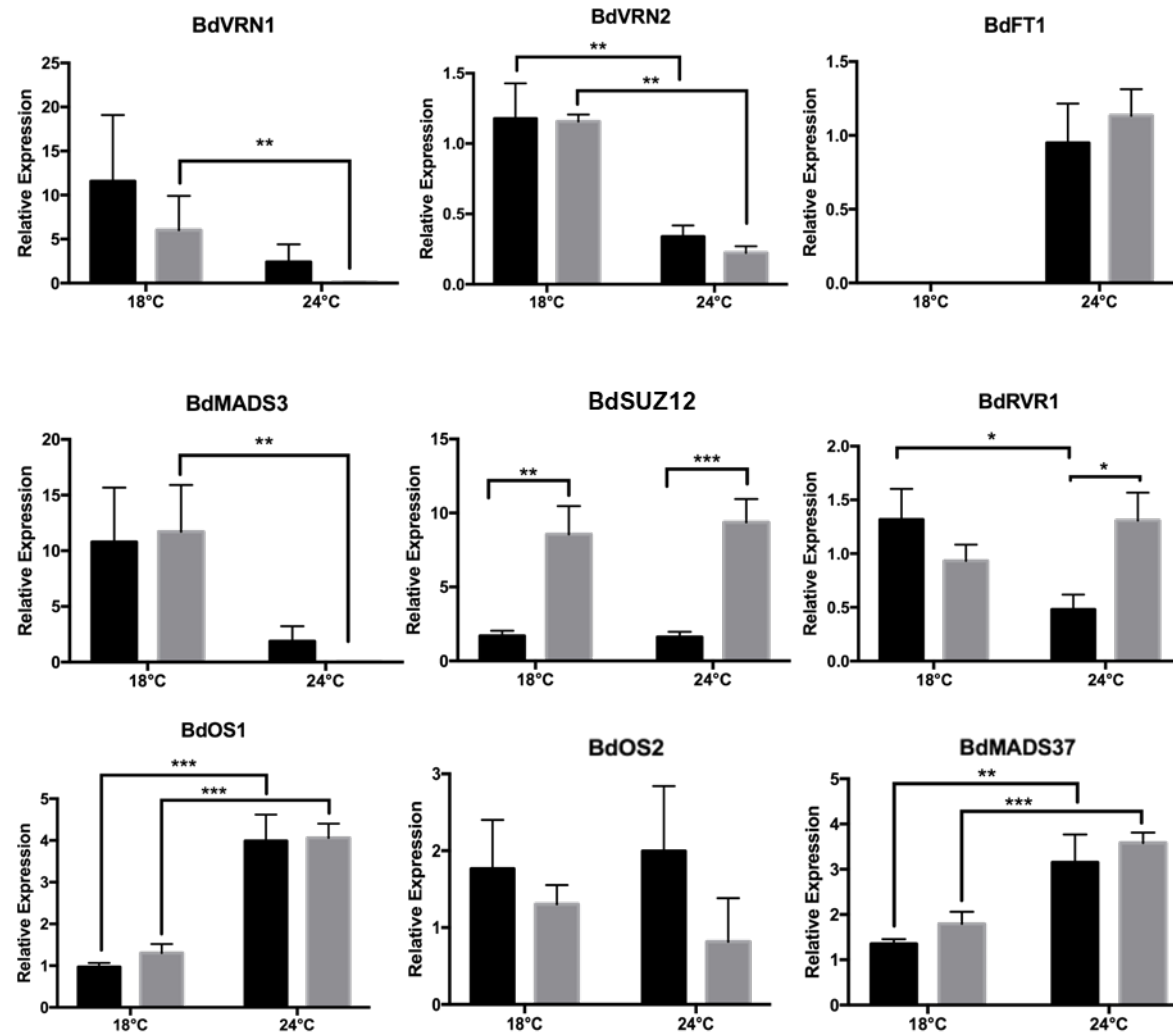

**Supplementary Figure S3. Key regulators of flowering time are differentially expressed in *bdvrt2* mutants at the three-leaf stage.** Black bars = segregating null siblings; grey bars = *bdvrt2* T-DNA mutants. Five biological replicates were used for each time point. Whole seedlings (minus roots) were used. *BdFT1* was not detected at 18°C. Asterisks indicate the p-value from Student's *t* test of normalised data: \*\* =  $p < 0.01$ ; \*\*\* =  $p < 0.001$ . Error bars represent SEM.

**Table S1.** Primers for CRISPR edit genotyping and qPCR

| Primer name       | Primer sequence (5'-3') |
|-------------------|-------------------------|
| CRISPR genotyping |                         |
| BdVRT2.F          | ACCTATCTATTTTCAGGTCCGGC |
| BdVRT2.R          | CACGCGCATATGTGAGATCG    |

| qPCR            |                           |
|-----------------|---------------------------|
| Bd21-3.UBC18.F  | GTCGACTTCCCCGAGCATT       |
| Bd21-3.UBC18.R  | ATAGGCGCCGGGTTGAG         |
| Bd21-3.VRN1.F   | ATCCGCCTAATGGCACAGCA      |
| Bd21-3.VRN1.R   | AATCGAGACACGAACCCAGCC     |
| Bd21-3.VRN2.F   | GAACCGGCCACTCATGGAT       |
| Bd21-3.VRN2.R   | CACCGAATGGCATGATGGT       |
| Bd21-3.FT1.F    | GCGAGCTCAAGCCTTCCAT       |
| Bd21-3.FT1.R    | CGAGTGTATAGAAGGTCTCATCTCA |
| Bd21-3.OS1.F    | CCGGCAAGCTCTACGAGTACTC    |
| Bd21-3.OS1.R    | GCTCCCGCAAATTGCTGAT       |
| Bd21-3.OS2.F    | AAATCCAAGATATTGGCAAAACG   |
| Bd21-3.OS2.R    | CCTTAGGCTCACTGGAGTTCTCA   |
| Bd21-3.MADS37.F | CAATCTGAGGATGAAGGTGTCACA  |
| Bd21-3.MADS37.R | GCTTGACAAGTTGTTGCTTTCT    |
| Bd21-3.VRT2-2.F | GCCAATGGTGGCAAATACGG      |
| Bd21-3.VRT2-2.R | ACCCCTCAAGTTCCTCACCT      |
| Bd1-1.UBQ.5.F   | CGCCGACTACAACATCCAG       |
| Bd1-1.UBQ.5.R   | TCACCTTCTGTGCTTGTGC       |
| Bd1-1.CDCP.478F | CTGAGCAAAACCAATGGGCA      |
| Bd1-1.CDCP.604R | CAGGCAGCCTGCGGTATTTA      |
| Bd1-1.VRN1.q.F  | GCTCTGCAGAAGGAACTTGTGG    |
| Bd1-1.VRN1.q.R  | CTAGTTTGCGGGTGTGTTTGCTC   |
| Bd1-1.RVR1.q.F  | TGCACGTTCACTGATCATG       |
| Bd1-1.RVR1.q.R  | TTACCAACGCAAAGCTTCCC      |
